# Supplementary material
Source: PubMed Central journal article supplement (PMC4784765)
Supplement: bels026658.ww1_default.pdf [file bels026658.ww1_default.pdf]

## Appendix 1: Operation Procedure Codes included in Study

|     |                                                             |     |                                                                  |
|-----|-------------------------------------------------------------|-----|------------------------------------------------------------------|
| W15 | 1st Metatarsal Osteotomy, e.g. for Hallux Valgus            | W19 | Primary Open Reduction of Fracture with Intramedullary Fixation  |
| W37 | Total Hip Replacement, cemented                             | W20 | Primary Open Reduction of Fracture with Extra medullary Fixation |
| W38 | Total Hip Replacement, uncemented                           | W21 | Primary Open Reduction of Intra-articular Fracture with Fixation |
| W39 | Total Hip Replacement, other                                | W22 | Other Primary Open Reduction of Fracture                         |
| W94 | Total Hip Replacement, hybrid, cemented                     | W23 | Secondary Open Reduction of Fracture                             |
| W95 | Total Hip Replacement, hybrid, uncemented                   | W24 | Closed Reduction of Fracture with Internal Fixation              |
| W40 | Total Knee Replacement, cemented                            | W25 | Closed Reduction of Fracture with External Fixation              |
| W41 | Total Knee Replacement, uncemented                          | W46 | Prosthetic Replacement of Head of Femur, cemented                |
| W42 | Total Knee Replacement, other                               | W47 | Prosthetic Replacement of Head of Femur, uncemented              |
| W43 | Total Prosthetic Replacement of Other Joint, cemented       |     |                                                                  |
| W44 | Total Prosthetic Replacement of Other Joint, uncemented     |     |                                                                  |
| W49 | Humeral Head Replacement, cemented                          |     |                                                                  |
| W50 | Humeral Head Replacement, uncemented                        |     |                                                                  |
| W59 | Fusion of Toe Joint                                         |     |                                                                  |
| W60 | Fusion of Other Joint                                       |     |                                                                  |
| W96 | Total Shoulder Replacement, cemented                        |     |                                                                  |
| W97 | Total Shoulder Replacement, uncemented                      |     |                                                                  |
| O06 | Hybrid Total Shoulder Replacement, cemented humerus         |     |                                                                  |
| O07 | Hybrid Total Shoulder Replacement, cemented glenoid         |     |                                                                  |
| O08 | Hybrid Total Shoulder Replacement, both components cemented |     |                                                                  |
| O21 | Total Elbow Replacement, cemented                           |     |                                                                  |
| O22 | Total Elbow Replacement, uncemented                         |     |                                                                  |

## Appendix 2: Example of using model to compute post-operative risk of AKI

In order to illustrate how to use the model to compute post-operative risk of AKI, we have used an example: a 70 year old diabetic man with baseline eGFR of 45 ml/min taking Ramipril and on 3 medicines in total with an ASA grade of 2 (see also appendix 3 for the same example in the excel risk calculator).

To compute his post-operative risk, his prognostic index (PI) has to be computed first. This is achieved by multiplying the estimated coefficients with the values of the predictor variables of the patient and taking the sum of these multiplications, added by the intercept of the model, see Table 2. Adding all B\*X terms and the intercept results in a prognostic index of -0.786. Computation of a prognostic index with the current model can also be expressed as a general formula:

$$\text{PI} = -2.385 + 0.022 * \text{Age} + (-0.708 \text{ if female}) + (0.427 \text{ if diabetic}) + (0.534 \text{ if on ACE inhibitor or Angiotensin receptor blocker}) + (0.130 \text{ if 1 or 2 medicines}) + (0.347 \text{ if 3 or more medicines}) + (-1.417 \text{ if eGFR} \geq 60) + (-1.108 \text{ if eGFR } 45\text{-}59) + (-0.676 \text{ if eGFR } 30\text{-}44) + (-1.037 \text{ if ASA}=1) + (-0.141 \text{ if ASA}=2) + (0.014 \text{ if ASA}=3).$$

Filling out the example values of the predictor variables results in the same value for the PI:

$$\text{PI} = -2.385 + 0.022 * 70 + 0.427 + 0.534 + 0.347 - 1.108 - 0.141 = -0.786.$$

Since the prediction model is a logistic model post-operative risk of AKI can then be computed by:

$$\text{Post-operative risk of AKI} = \exp(\text{PI}) / (1 + \exp(\text{PI})).$$

Thus, in this example, the post-operative risk is of AKI is  $\exp(-0.786) / (1 + \exp(-0.786)) = 0.46 / 1.46 = 31.3\%$ .
